# Supplementary material for: Three-dimensional superdiffusive chemical waves in a precipitation system
Source: Royal Society of Chemistry journal article supplement (doi:10.1039/c4cp02587c), 2014-01-01
Supplement: c4cp02587c2.pdf [file c4cp02587c2.pdf]

**Electronic Supplementary Information Description:**

**Video 1:** Initial conditions: inner,  $[\text{Hg}^{2+}]_0 = 0.23 \text{ M}$  in 1% per volume agar gel, outer,  $[\text{I}^-]_0 = 4.0 \text{ M}$ . Displays the evolution and formation of a spiral wave accompanied by the process of breakup leading to defect-mediated chemical turbulence.

**Video 2:** Initial conditions: inner,  $[\text{Hg}^{2+}]_0 = 0.26 \text{ M}$  in 1% per volume agar gel, outer,  $[\text{I}^-]_0 = 3.0 \text{ M}$ . Displays the evolution and formation of a circular wave (target) accompanied by the process of breakup leading to defect-mediated chemical turbulence.

All the videos are prepared by compiling a series of consecutive frames captured at 5-second intervals. In the videos the frames are set to appear for 0.2 seconds, which implies that the videos do not reflect real time evolution.
